# Supplementary material
Source: publisher site journal article supplement (https://kjim.org/upload/media/kjim-2024-244-Supplementary-Table-1.pdf)
Supplement: Supplementary file 1 [file kjim-2024-244-Supplementary-Table-1.pdf]

**Supplementary Table 1. Comparison of comorbidity between the 90-day-survivors and nonsurvivors treated with PMX-DHP**

| Characteristic         | Total    | Non-survivors <sup>a)</sup> | Survivors <sup>a)</sup> | <i>p</i> value |
|------------------------|----------|-----------------------------|-------------------------|----------------|
| Lung cancer            | 1 (10.0) | 0 (0.0)                     | 1 (33.3)                | > 0.999        |
| Diabetes mellitus      | 1 (10.0) | 0 (0.0)                     | 1 (33.3)                | > 0.999        |
| Ischemic heart disease | 0 (0.0)  | 0 (0.0)                     | 0 (0.0)                 | > 0.999        |
| CVA                    | 1 (10.0) | 1 (14.3)                    | 0 (0.0)                 | > 0.999        |
| COPD                   | 1 (10.0) | 0 (0.0)                     | 1 (33.3)                | > 0.999        |
| CCI                    | 2.900    | 2.857                       | 3.000                   | 0.849          |

Values are presented as number (%).

PMX-DHP, direct hemoperfusion with a polymyxin B-immobilized fiber column; CVA, cardiovascular accidents, COPD, chronic obstructive pulmonary disease, CCI, Charlson Comorbidity Index.

<sup>a)</sup>The nonsurvivors and survivors were classified at 90 days from the time of admission.
